# Supplementary material for: Synthesis and characterisation of polynorepinephrine-shelled microcapsules via an oil-in-water emulsion templating route
Source: Royal Society of Chemistry journal article supplement (doi:10.1039/d1tb01786a), 2021-01-01
Supplement: d1tb01786a1.pdf [file d1tb01786a1.pdf]

# Synthesis and characterisation of polynorepinephrine-shelled microcapsules via an oil-in-water emulsion templating route

## Supplementary Information

Zhenzhen Lu<sup>a</sup>, Shahinur Acter<sup>a</sup>, Boon M. Teo<sup>a\*</sup>, Rico F. Tabor<sup>a\*</sup>

*a.* School of Chemistry, Monash University, Clayton VIC 3800, Australia [boonmian.teo@monash.edu](mailto:boonmian.teo@monash.edu), [rico.tabor@monash.edu](mailto:rico.tabor@monash.edu)

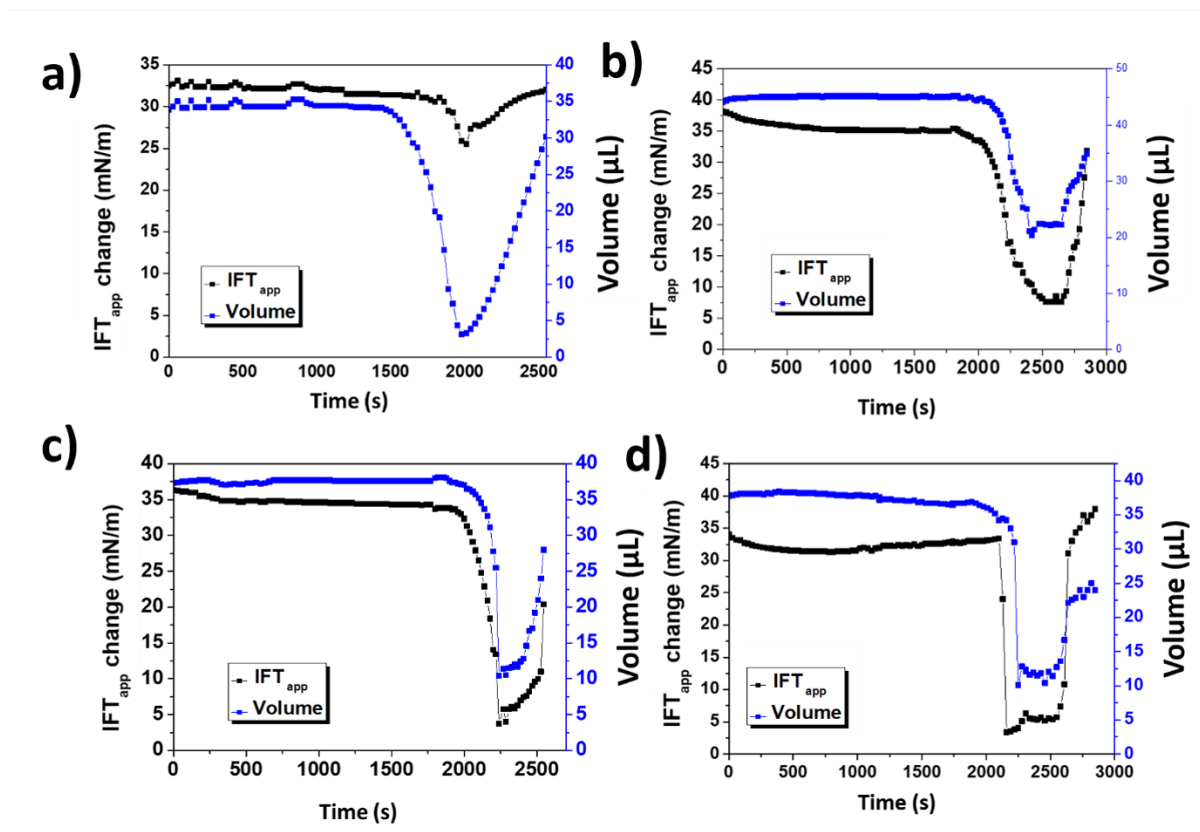

Figure S1. (a–d) compression/expansion measurements conducted at a flow rate 5 µL/min, showing the response of interfacial tension for (a) ultrapure water droplet, (b) 0.5 µM Cu<sup>2+</sup> and 2.5 mM NE microcapsules, (c) 2 µM Cu<sup>2+</sup> and 2.5 mM NE microcapsules (d) 5 µM Cu<sup>2+</sup> and 2.5 mM NE microcapsules.

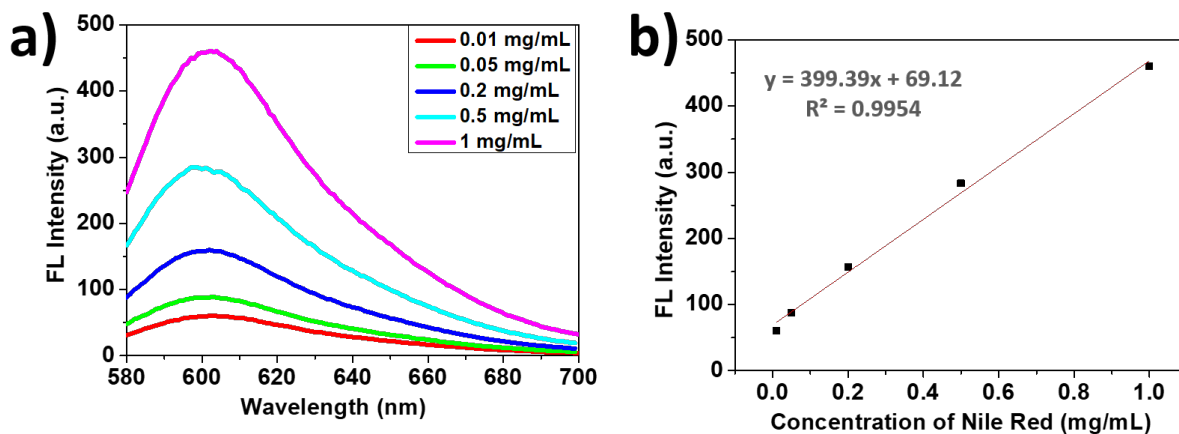

Figure S2. (a) Fluorescence spectra of Nile Red at the concentration of 0.01, 0.05, 0.2, 0.5 and 1 mg/mL. (b) standard curve for Nile Red concentration vs fluorescence intensity.

The fluorescence spectra of 0.01, 0.05, 0.2, 0.5 and 1 mg/mL Nile Red DCM solution were present in Figure S2a when excitation wavelength is 550 nm. A linear standard calibration curve of 0.99 was obtained at Nile red concentration range from 0.01-1 mg/mL (Figure S2b).
